# Supplementary material for: The development of blood protein profiles in extremely preterm infants follows a stereotypic evolution pattern
Source: PubMed Central journal article supplement (PMC10397184; doi:10.1038/s43856-023-00338-1), 2023-08-02
Supplement: 43856_2023_338_MOESM2_ESM.pdf [file 43856_2023_338_MOESM2_ESM.pdf]

## Description of Additional Supplementary Files

**File Name:** Supplementary Data 1

**Description:** Clinical characteristics of the preterm infants

**File Name:** Supplementary Data 2

**Description:** Complete list of analyzed proteins

**File Name:** Supplementary Data 3

**Description:** Inter- and intra- individual variability of proteins

**File Name:** Supplementary Data 4

**Description:** Expressions of proteins in time-series clusters

**File Name:** Supplementary Data 5

**Description:** Tissue specificity of proteins in longitudinal clusters

**File Name:** Supplementary Data 6

**Description:** Immune cell specificity of proteins in longitudinal clusters

**File Name:** Supplementary Data 7

**Description:** Complete results of functional analysis of proteins in longitudinal clusters

**File Name:** Supplementary Data 8

**Description:** Variance explanation of protein levels after birth

**File Name:** Supplementary Data 9

**Description:** Blood proteins used for the predictive PNA model

**File Name:** Supplementary Data 10

**Description:** Differentially expressed proteins across GA groups

**File Name:** Source Data 1

**Description:** Source data for figure 1, figure 2a and figure 5.
